# Supplementary material for: Photochemical thiol–yne functionalization of polypeptide scaffolds
Source: Royal Society of Chemistry journal article supplement (doi:10.1039/c3py00428g), 2013-01-01
Supplement: c3py00428g.pdf [file c3py00428g.pdf]

Electronic Supporting Information to

## Photochemical thiol-yne functionalization of polypeptide scaffolds

Kai-Steffen Krannig,<sup>a</sup> Jin Huang,<sup>b</sup> Andreas Heise<sup>b</sup> and Helmut Schlaad<sup>\*a</sup>

<sup>a</sup> Max Planck Institute of Colloids and Interfaces, Department of Colloid Chemistry,  
Research Campus Golm, 14424 Potsdam, Germany. <sup>b</sup> Dublin City University,  
School of Chemical Sciences, Glasnevin, Dublin 9, Ireland.

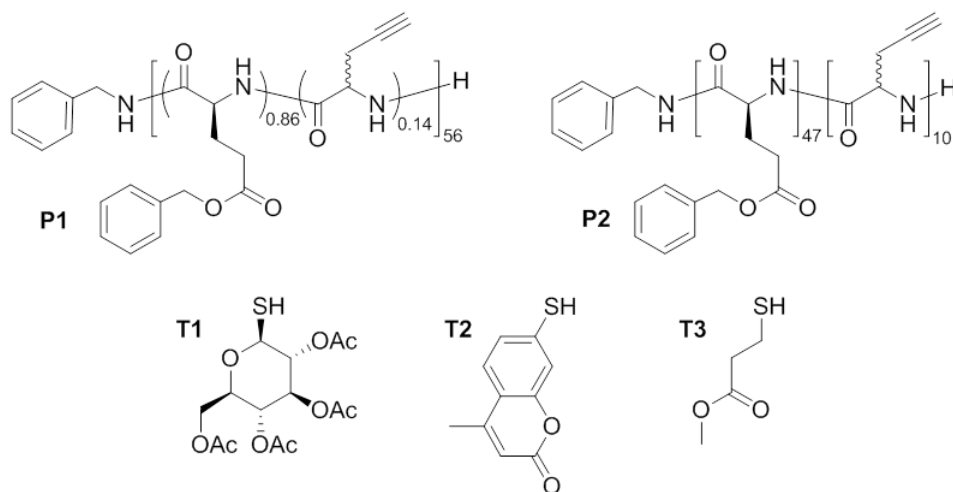

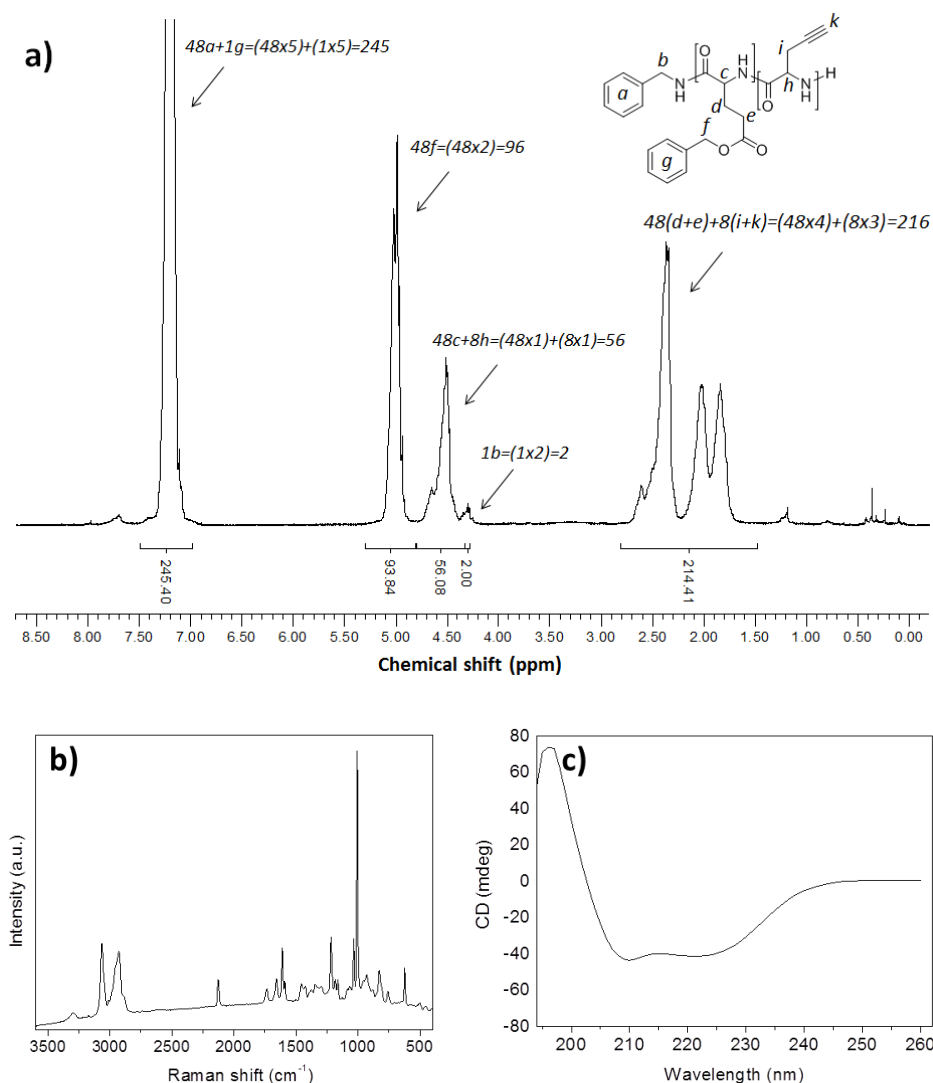

**Figure S1:** <sup>1</sup>H NMR (400.1 MHz, TFA-d) (a), Raman (b), and CD spectra (acetonitrile, 25 °C) (c) of copolypeptide **P1**.

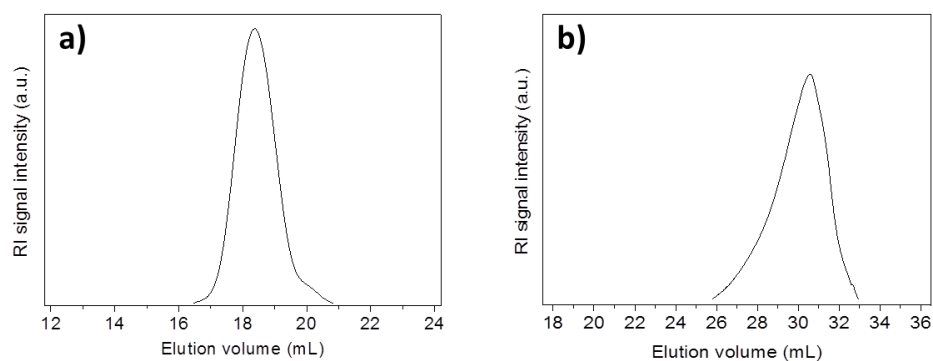

**Figure S2:** SEC traces of **P1**, eluent: NMP + LiBr, 70 °C (a) and THF, 25 °C (b).

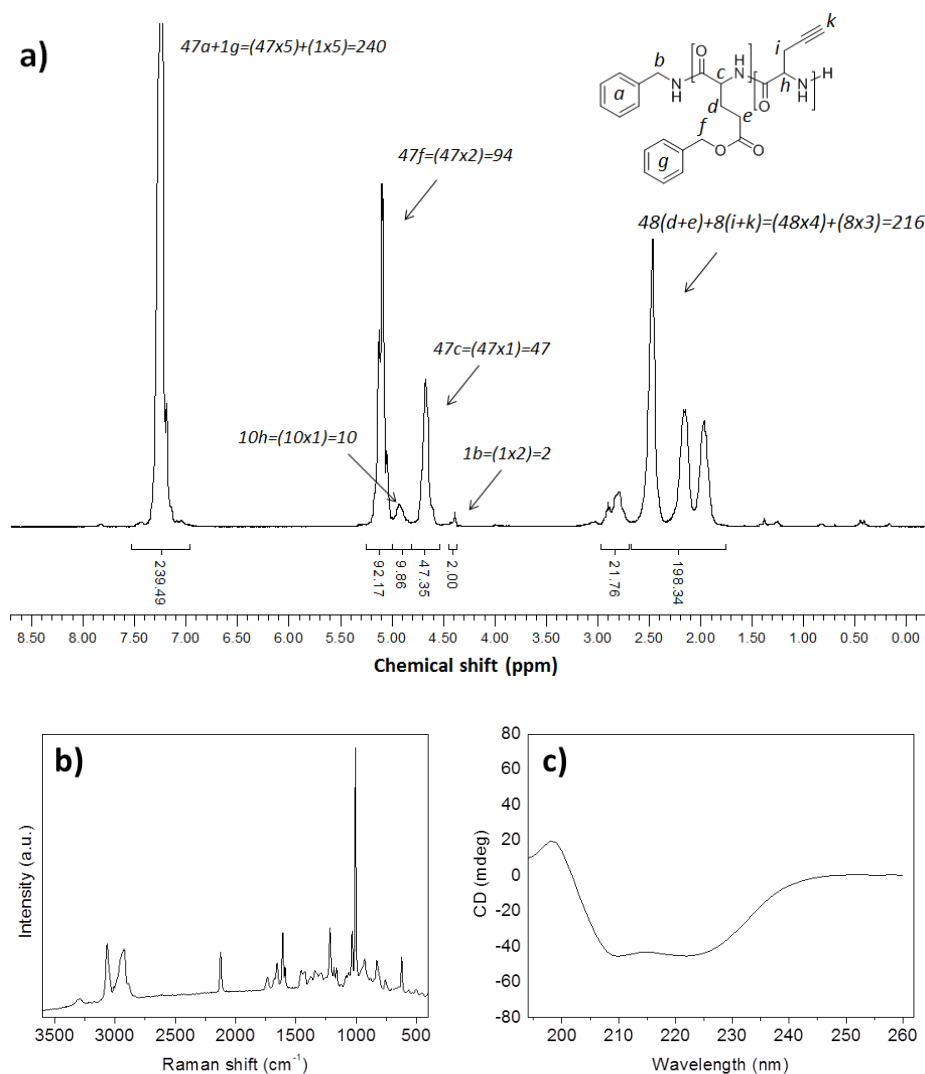

**Figure S3:** <sup>1</sup>H NMR (400.1 MHz, TFA-d) (a), Raman (b), and CD spectra (acetonitrile, 25 °C) (c) of block copolypeptide **P2**.

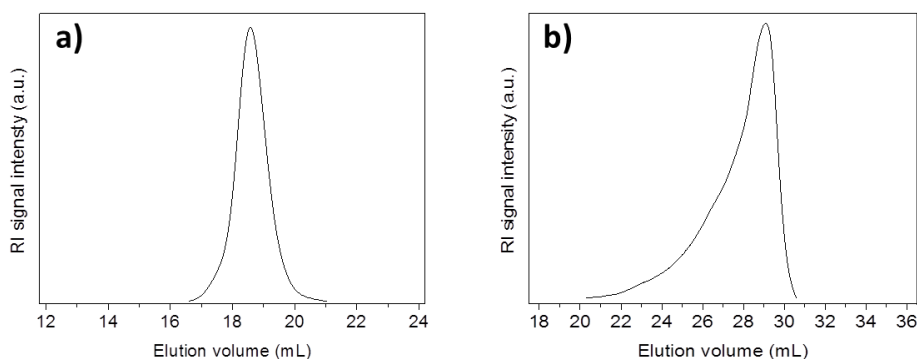

**Figure S4:** SEC traces of **P2**, eluent: NMP + LiBr, 70 °C (a) and THF, 25 °C (b).

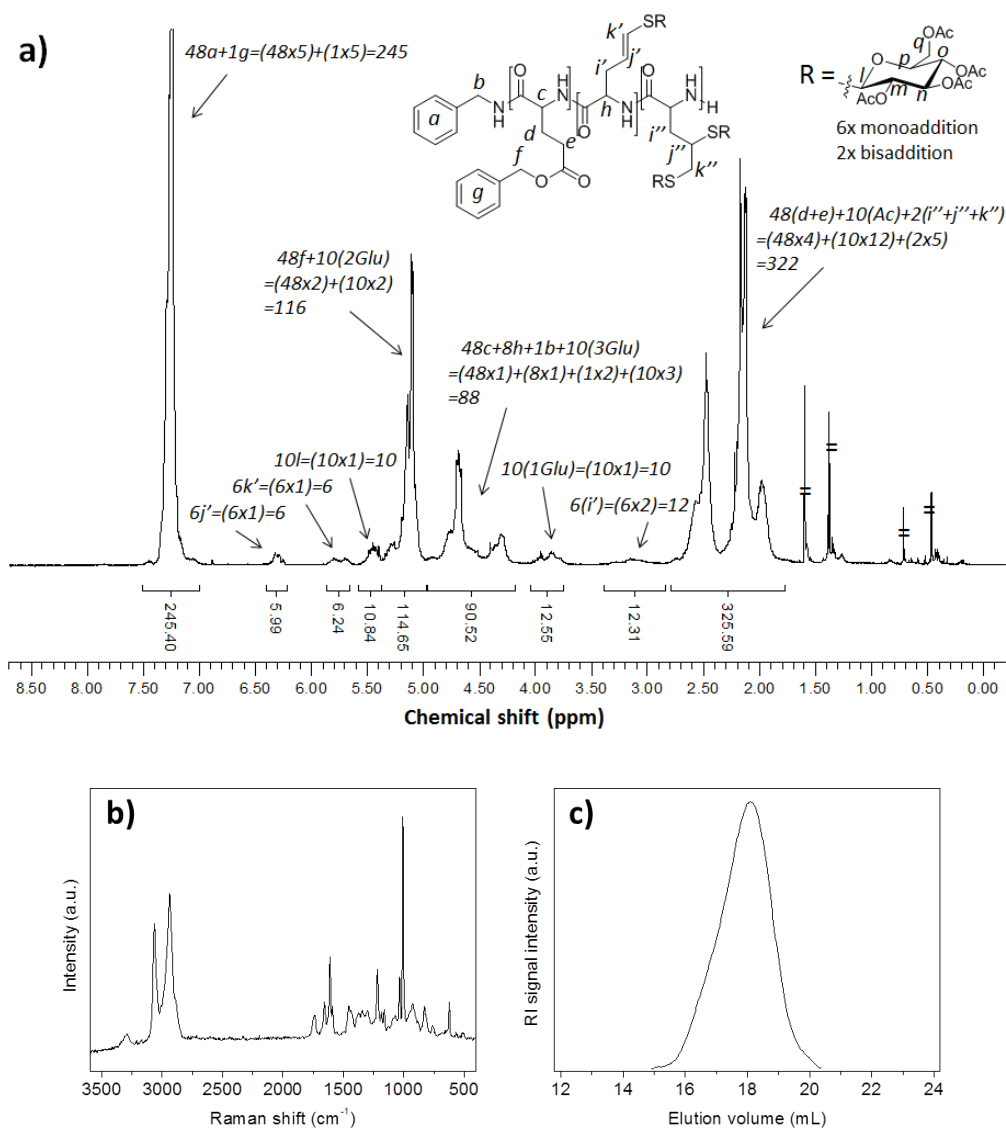

**Figure S5:**  $^1\text{H}$  NMR (400.1 MHz, TFA- $d$ ) (a), Raman spectra (b), and SEC trace (NMP + LiBr, 70 °C) (c) of copolypeptide **P1T1/a** (1.23 eq **T1**).

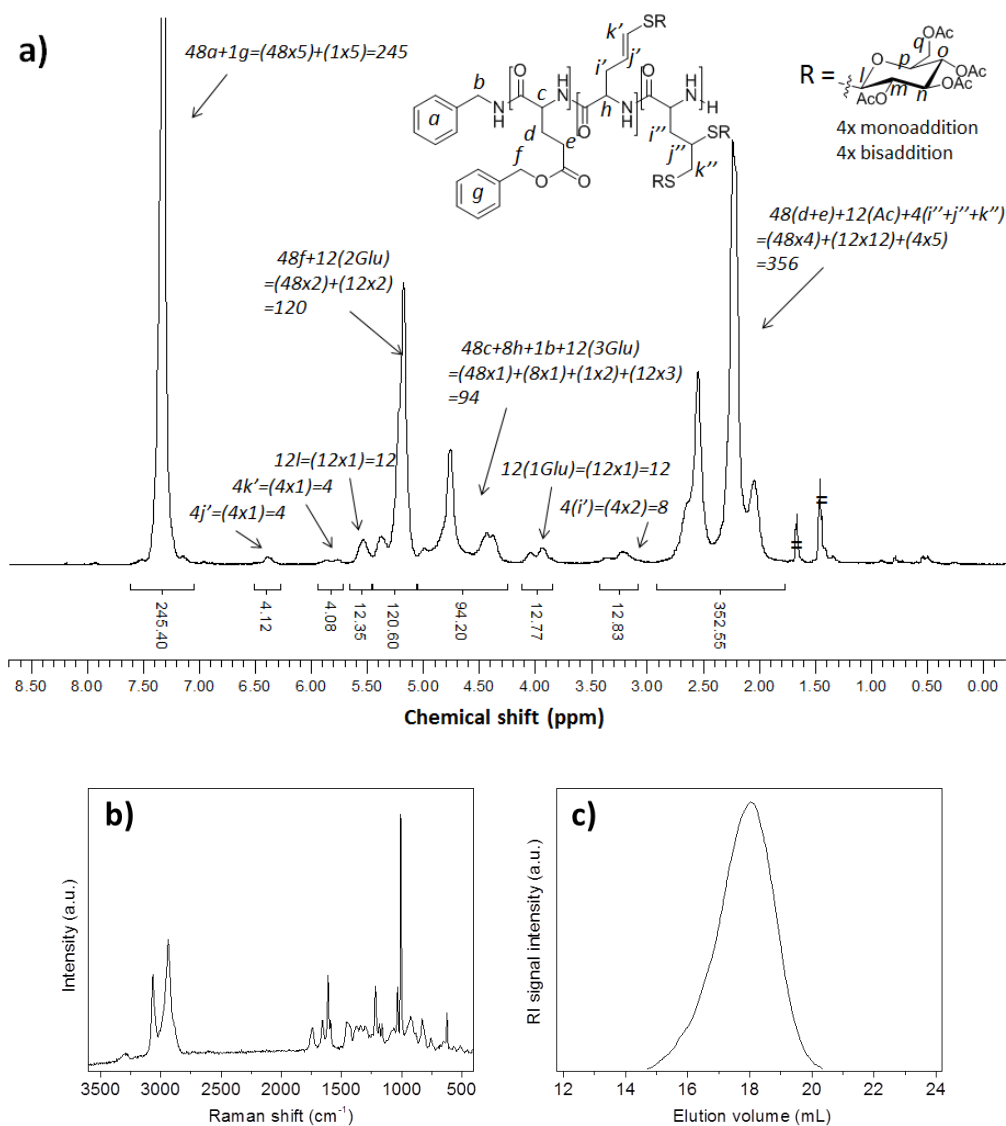

**Figure S6:**  $^1\text{H}$  NMR (400.1 MHz, TFA- $d$ ) (a), Raman spectra (b), and SEC trace (NMP + LiBr, 70 °C) (c) of copolypeptide **P1T1/b** (1.5 eq **T1**).

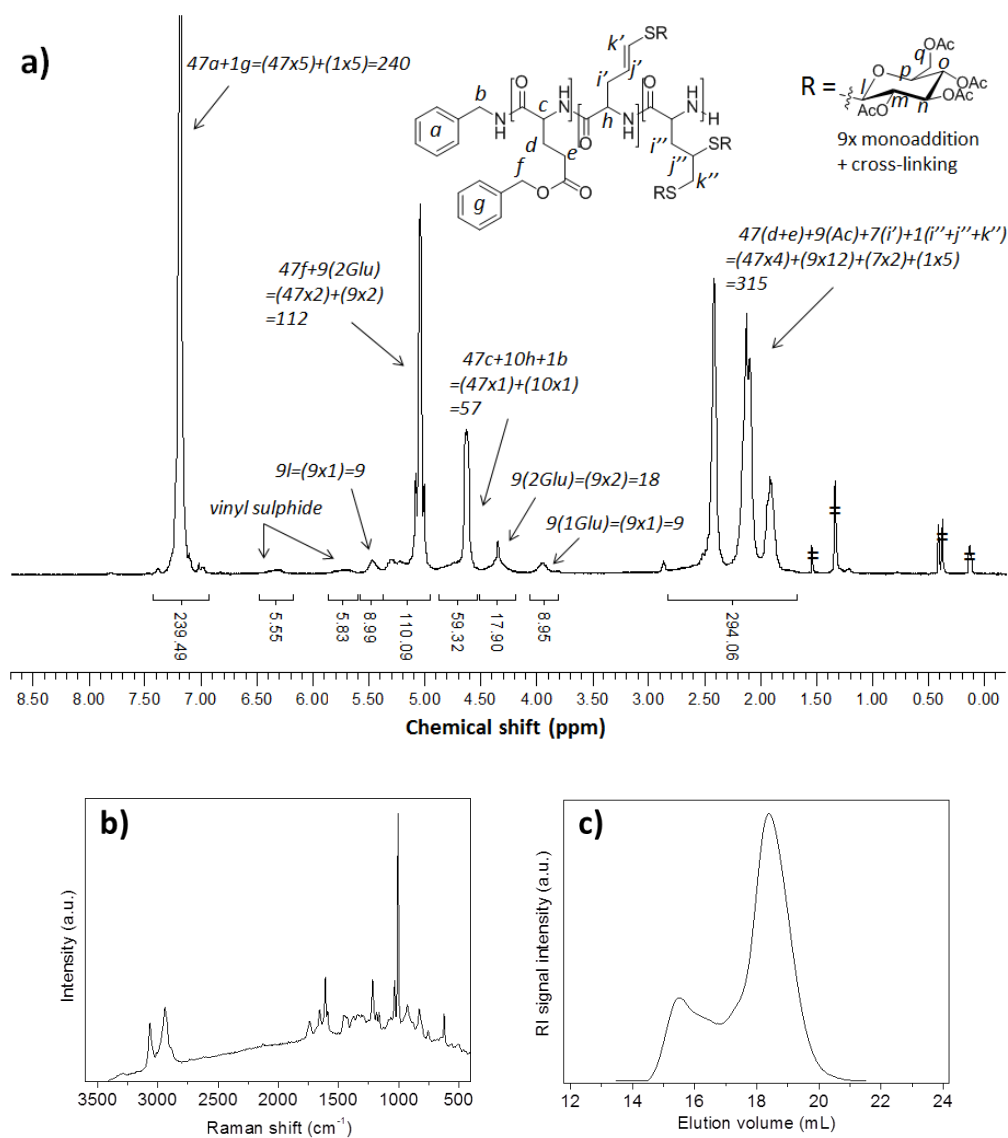

**Figure S7:**  $^1\text{H}$  NMR (400.1 MHz, TFA- $d$ ) (a), Raman spectra (b), and SEC trace (NMP + LiBr, 70 °C) (c) of block copolypeptide **P2T1/a** (0.9 eq **T1**) (Photoaddition reaction performed in THF solution).

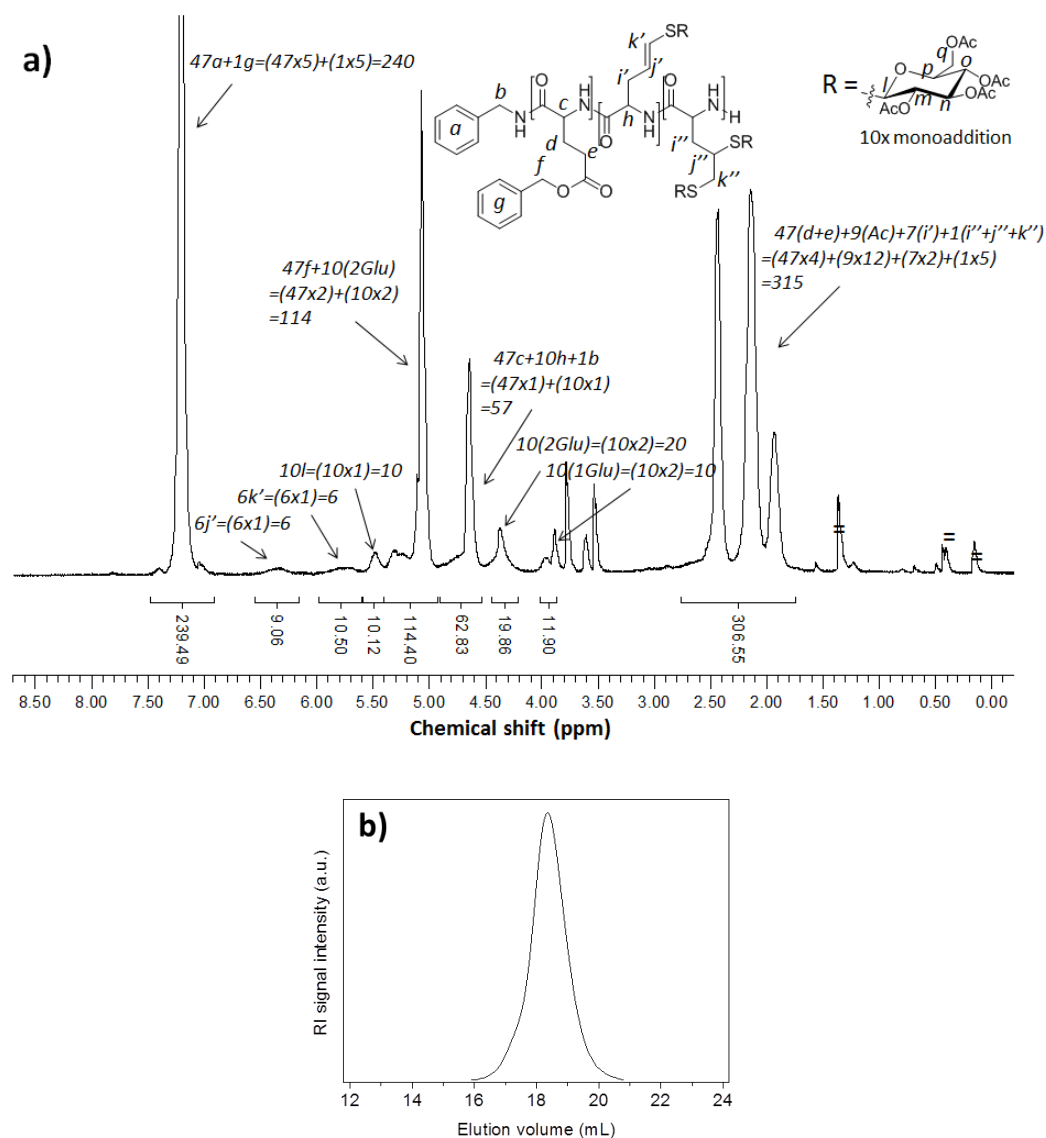

**Figure S8:**  $^1\text{H}$  NMR (400.1 MHz, TFA-d) (a) and SEC trace (NMP + LiBr, 70 °C) (b) of block copolypeptide **P2T1/b** (1.0 eq **T1**). (Photoaddition reaction performed in DMF solution).

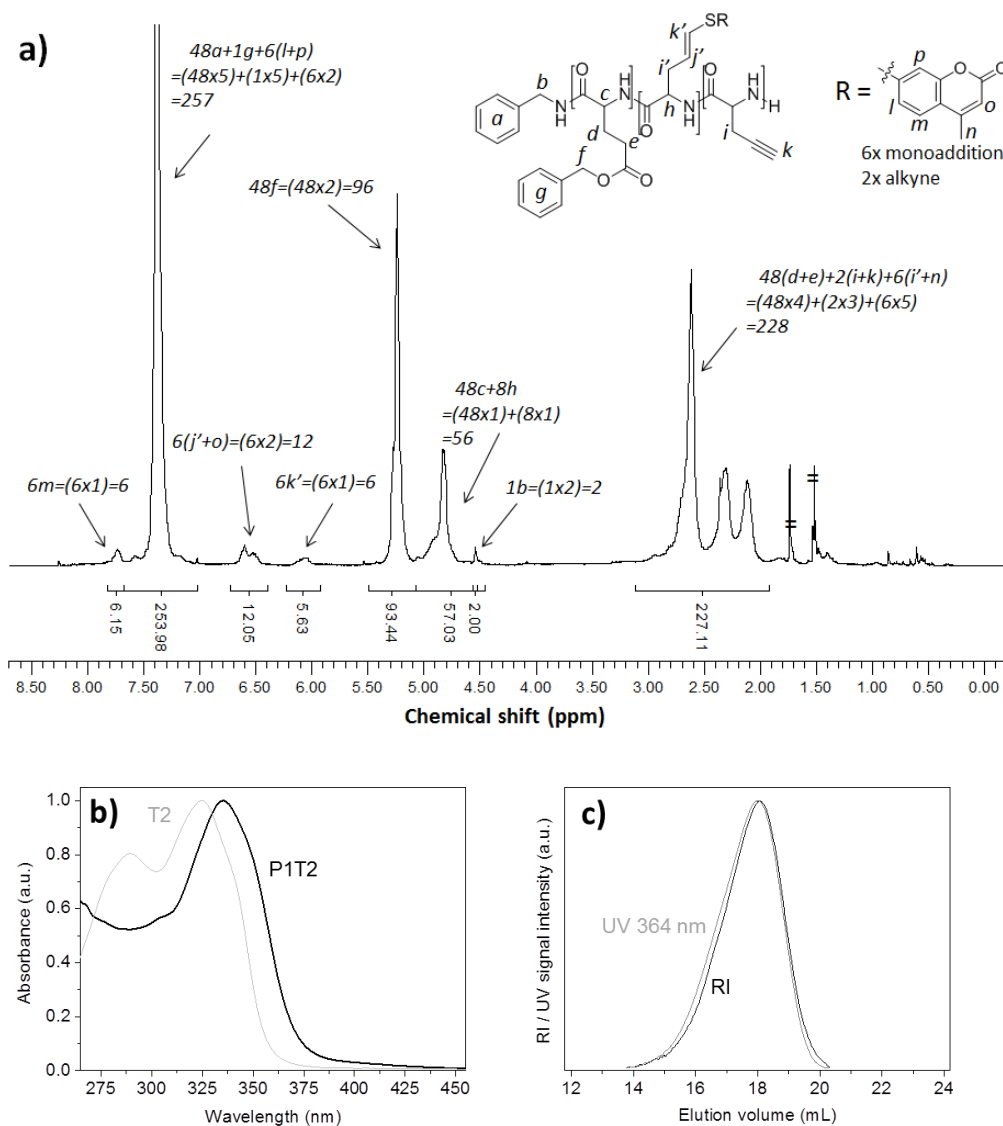

**Figure S9:**  $^1\text{H}$  NMR (400.1 MHz, TFA- $d$ ) (a), UV-visible spectra (THF, 25 °C) (b), and SEC trace (NMP + LiBr, 70 °C) (c) of copolypeptide **P1T2** (0.75 eq **T2**).



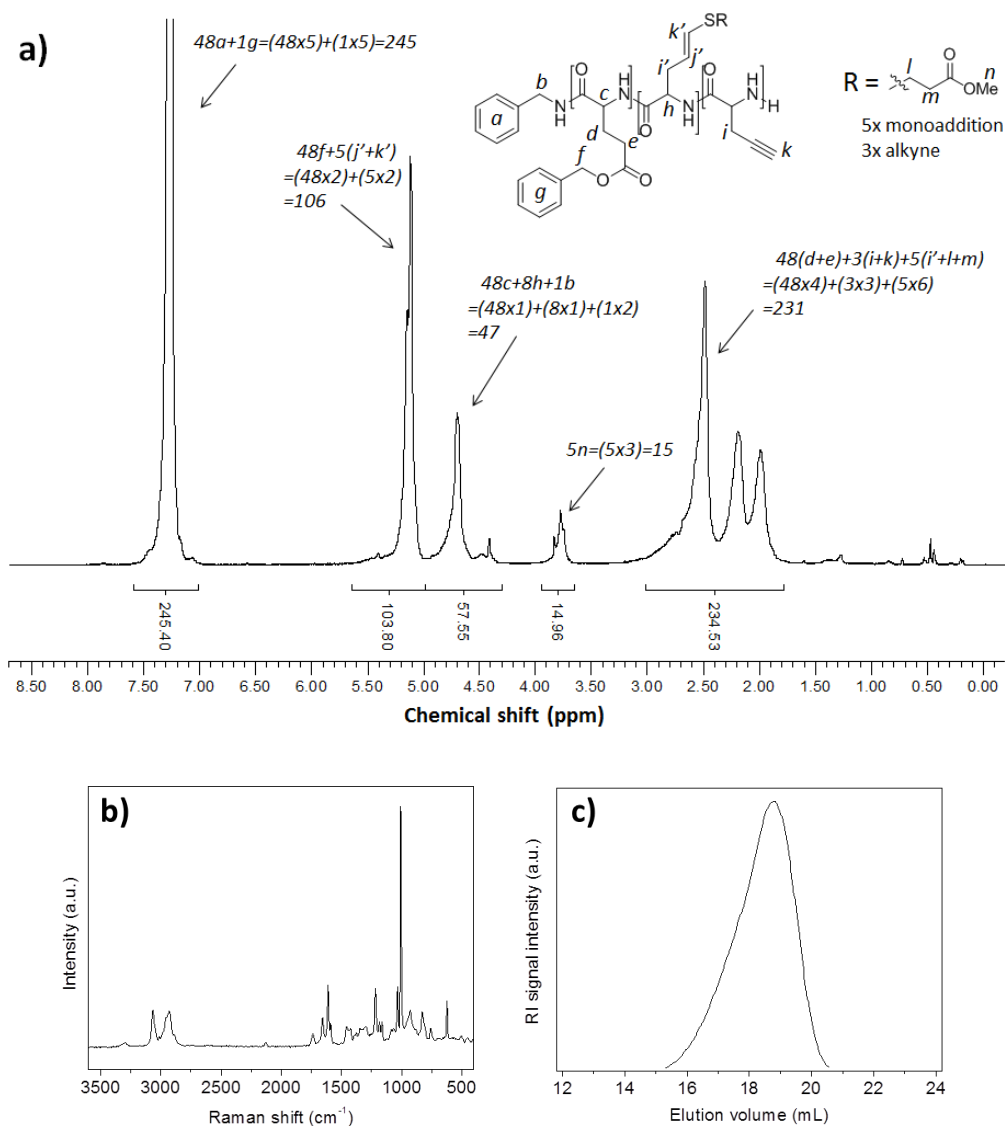

**Figure S10:**  $^1\text{H}$  NMR (400.1 MHz,  $\text{TFA-d}$ ) (a), Raman spectra (b), and SEC trace (NMP + LiBr, 70 °C) (c) of copolypeptide **P1T3/a** (0.63 eq **T3**).

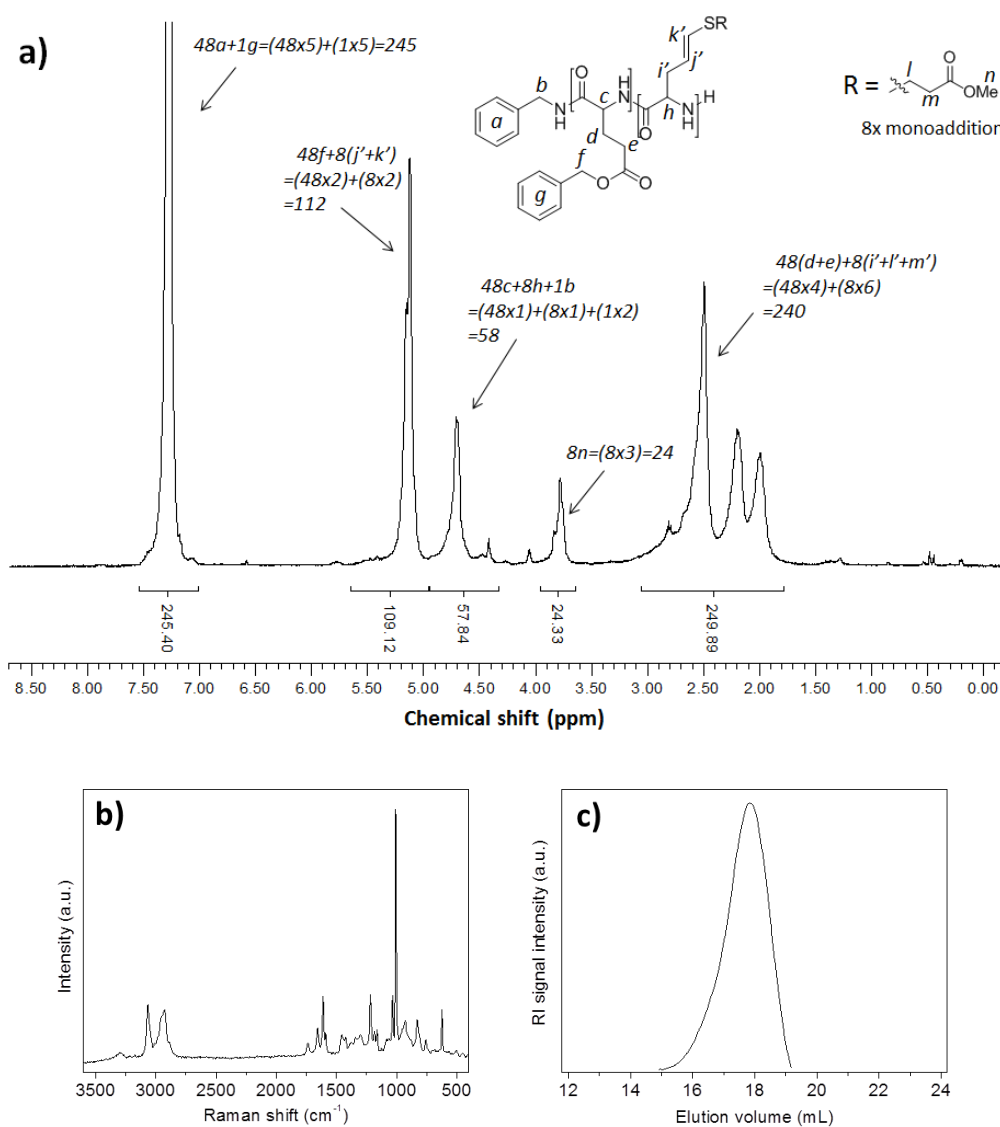

**Figure S11:** <sup>1</sup>H NMR (400.1 MHz, TFA-d) (a), Raman spectra (b), and SEC trace (NMP + LiBr, 70 °C) (c) of copolypeptide **P1T3/b** (1.0 eq **T3**).

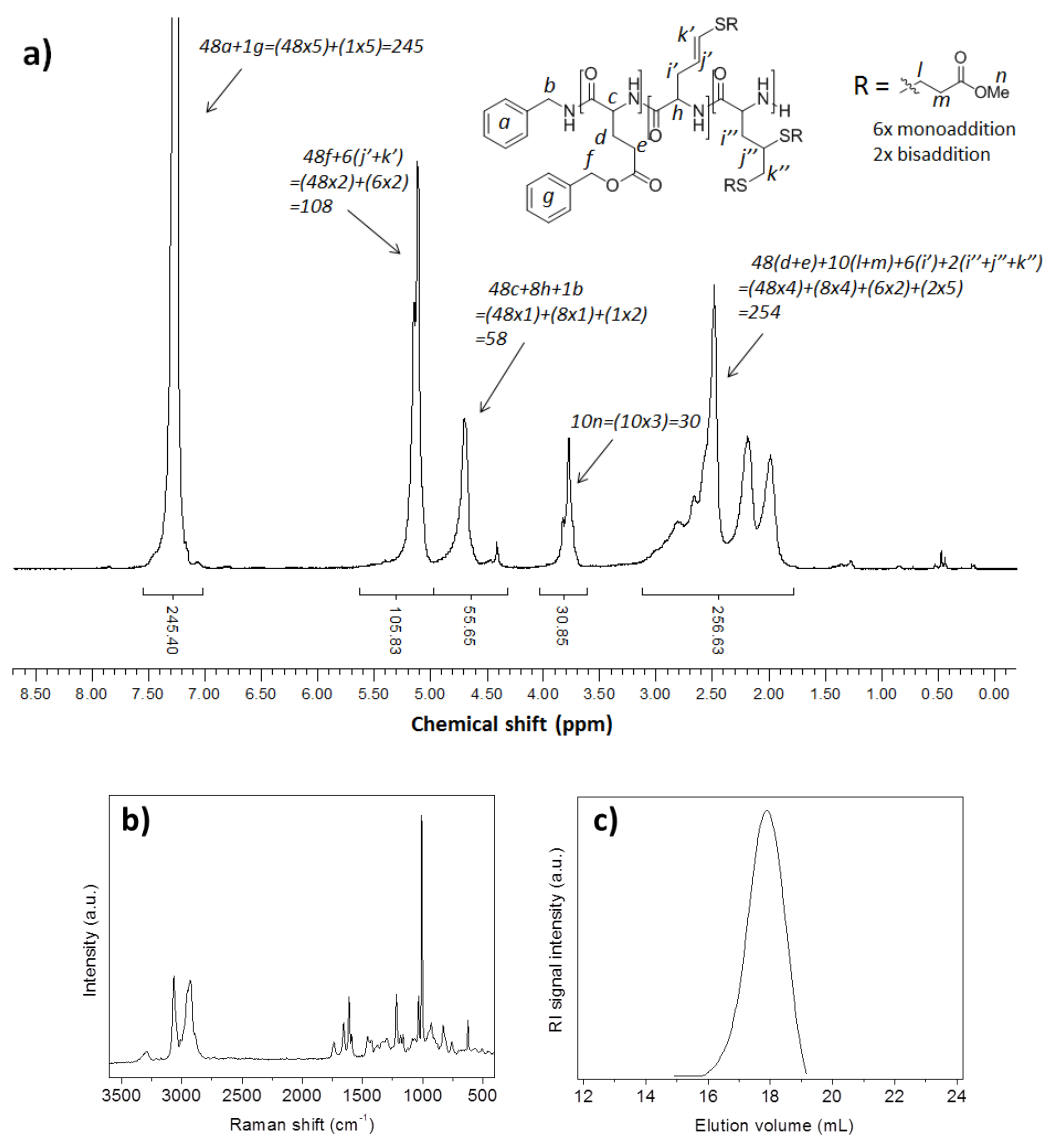

**Figure S12:**  $^1\text{H}$  NMR (400.1 MHz, TFA- $d$ ) (a), Raman spectra (b), and SEC trace (NMP + LiBr, 70  $^\circ\text{C}$ ) (c) of copolypeptide **P1T3/c** (1.25 eq **T3**).

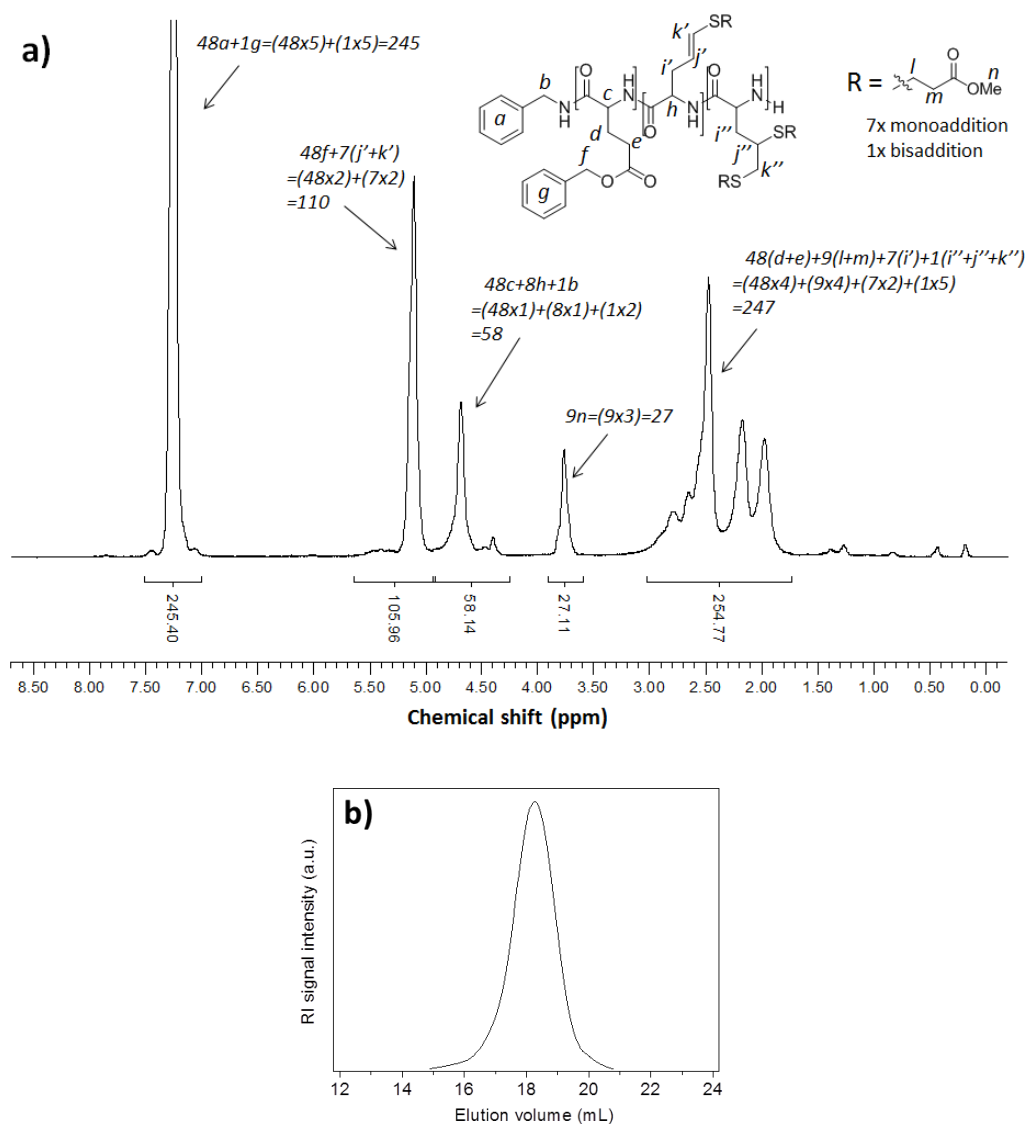

**Figure S13:**  $^1\text{H}$  NMR (400.1 MHz, TFA-d) (a) and SEC trace (NMP + LiBr, 70 °C) (b) of copolypeptide **P1T3/d** (1.13 eq **T3**). (Photoaddition reaction performed in DCM solution).

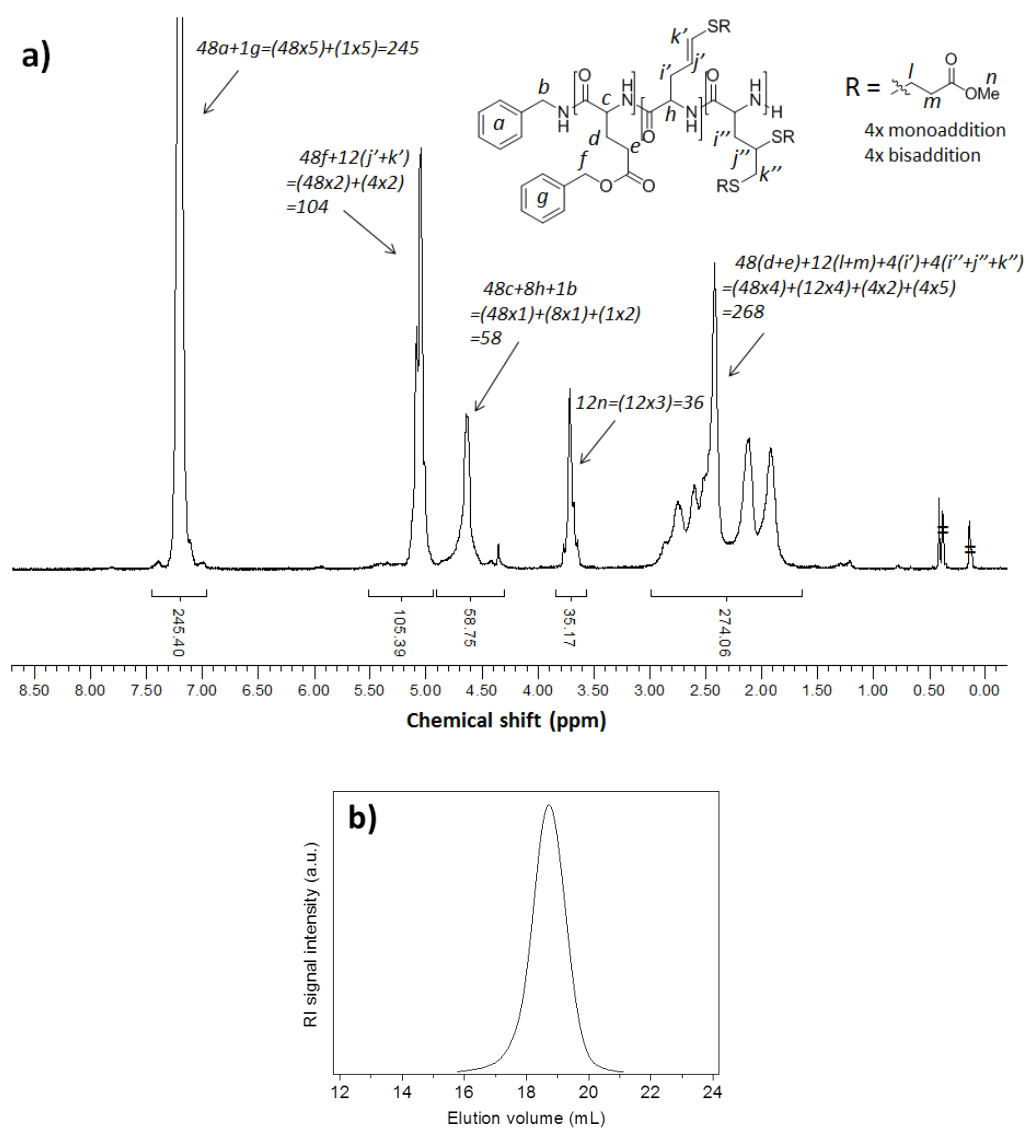

**Figure S14:**  $^1\text{H}$  NMR (400.1 MHz, TFA-d) (a) and SEC trace (NMP + LiBr, 70 °C) (b) of copolypeptide **P1T3/e** (added 1.5 eq **T3**). (Addition reaction performed in DMF solution at 70 °C, radical source: AIBN).

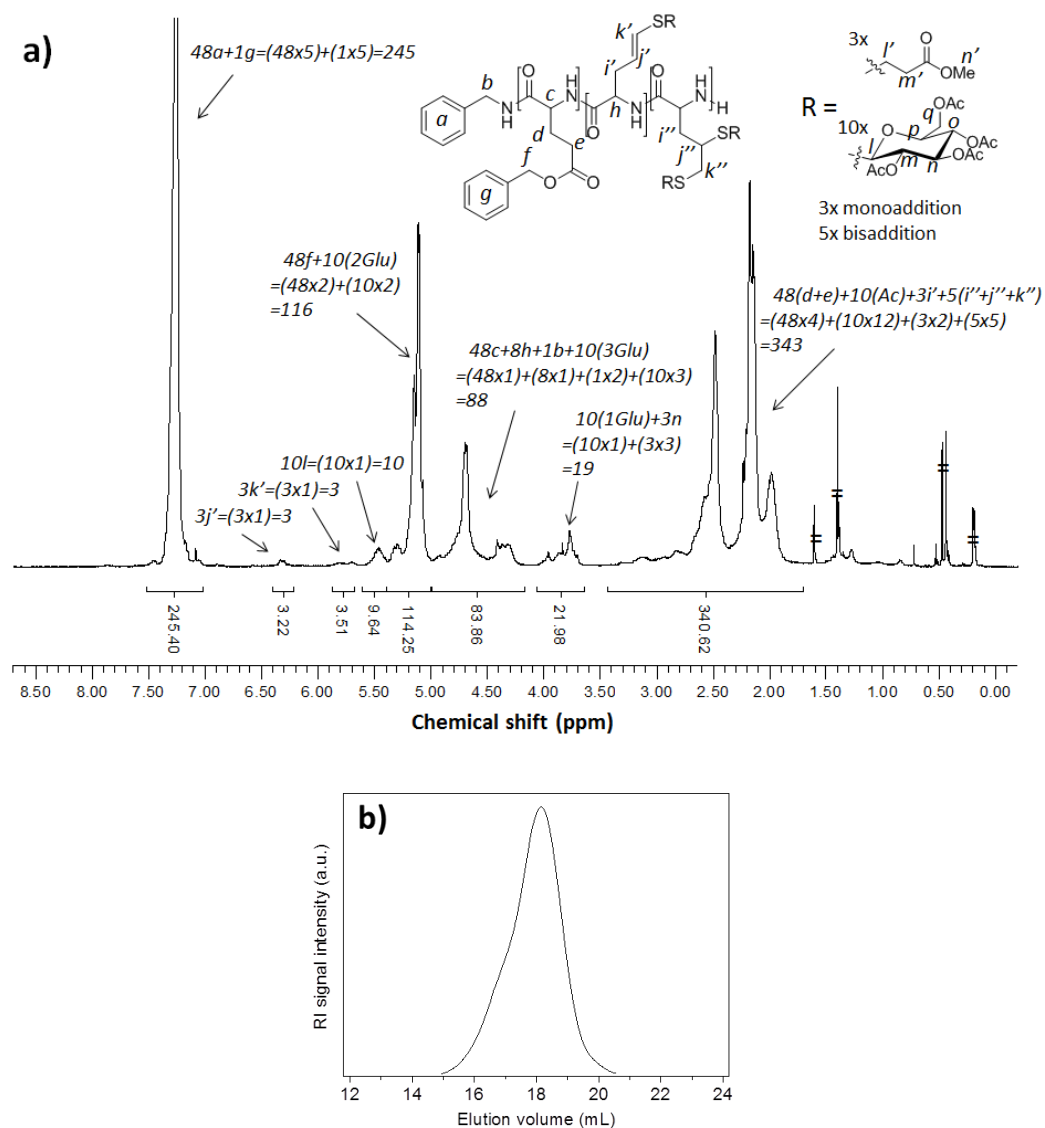

**Figure S15:**  $^1\text{H}$  NMR (400.1 MHz, TFA-*d*) (a) and SEC trace (NMP + LiBr, 70 °C) (b) of copolypeptide **P1T1T3** (1.25 eq **T1** and 0.38 eq **T3**).
